# Supplementary material
Source: PubMed Central journal article supplement (PMC2825759)
Supplement: NIHMS166015-supplement-1.pdf [file NIHMS166015-supplement-1.pdf]

BM:

WT

Myc-eGFP  
negative

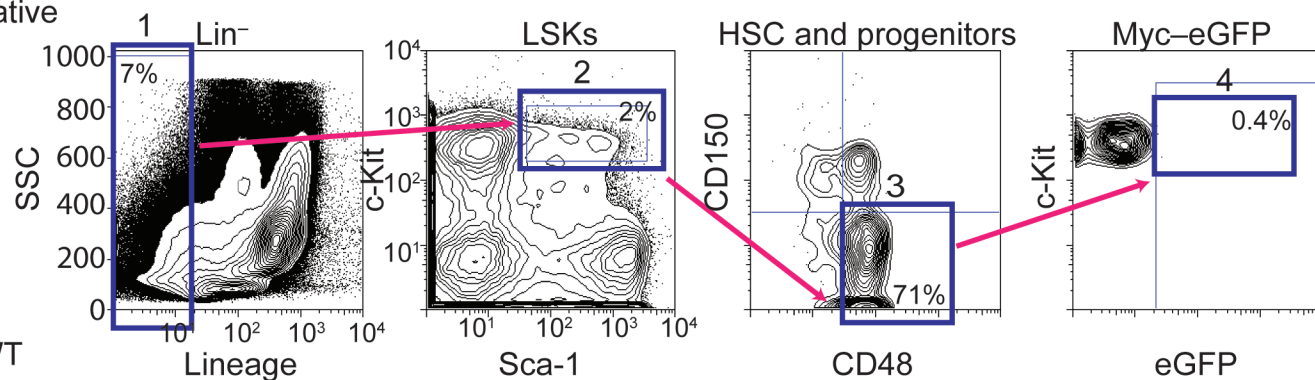

WT  
Myc-eGFP  
positive

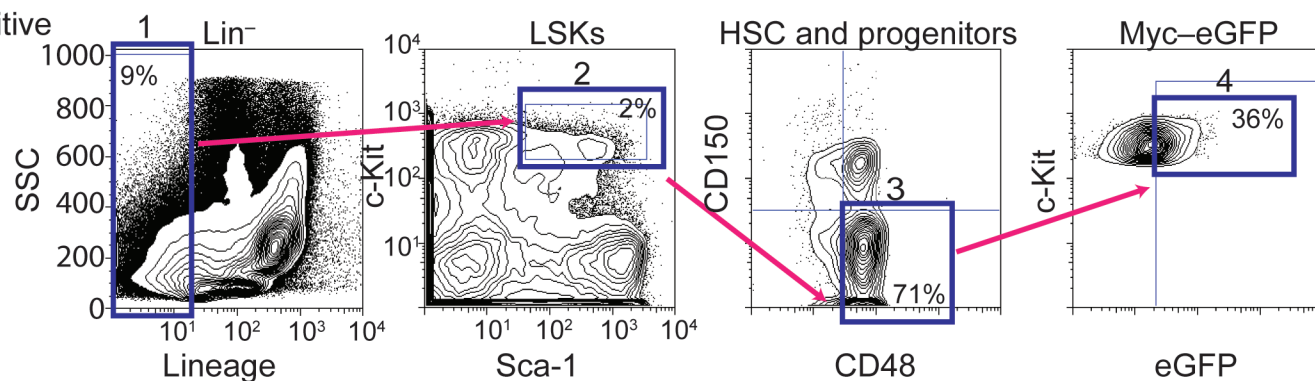

Supplemental Figure 1. Gating scheme and FMO control to identify true GFP positive populations. Diagram is a representation of gating scheme used to identify c-Myc-eGFP positive cells from the KI mouse. For each experiment evaluating the c-Myc-eGFP KI mouse, a c-Myc-eGFP negative littermate control was used to identify the appropriate GFP positive population (FMO control).

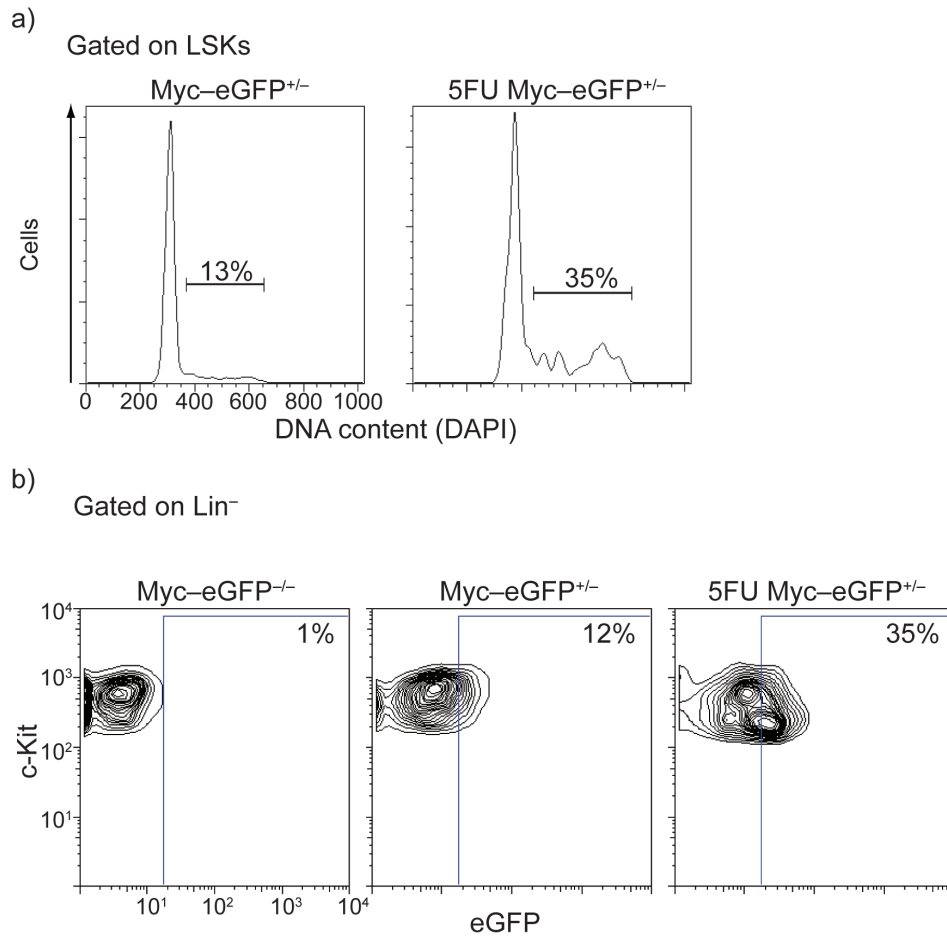

Supplemental Figure 2. 5-FU treatment increases the levels of c-Myc protein expression. a) 5-FU treatment leads to increased rates of cell cycle entry of LSK cells. DAPI staining of LSK cells 2 days after 5-FU treatment. b) Levels of c-Myc protein expression in LSK cells 2 days post 5-FU treatment. The gate was set using WT c-Myc-eGFP negative cells. Plots are representative of 3 independent experiments.

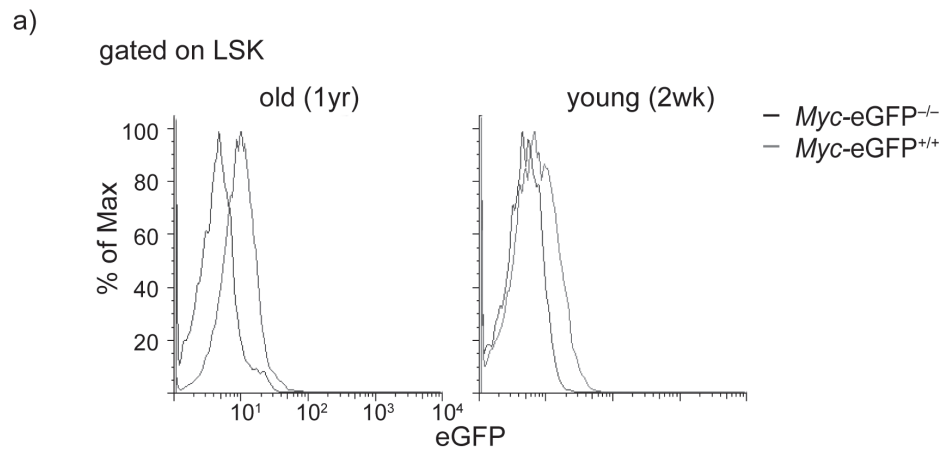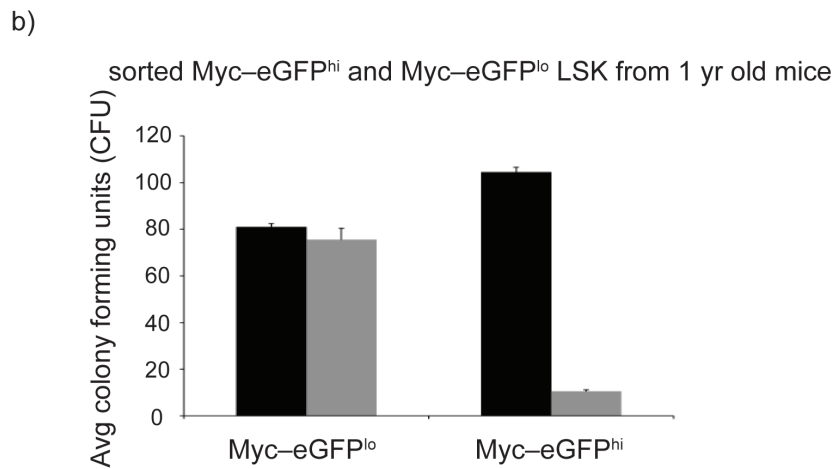

Supplemental Figure 3. Visualization of c-Myc protein abundance in “young” and “old” mice. a) Overlay histograms depicting levels of c-Myc-eGFP abundance in both young and old LSK subsets within the bone marrow. b) Methylcellulose in vitro cultures using sorted LSKs from “old” mice showing loss of self-renewal capacity in c-Myc-eGFP<sup>hi</sup> cells upon second plating yielding similar results as observed in 4-6wk old adult mice. Black: first plating, Grey: second plating Error bars indicate standard deviation (std) of n=3 mice.

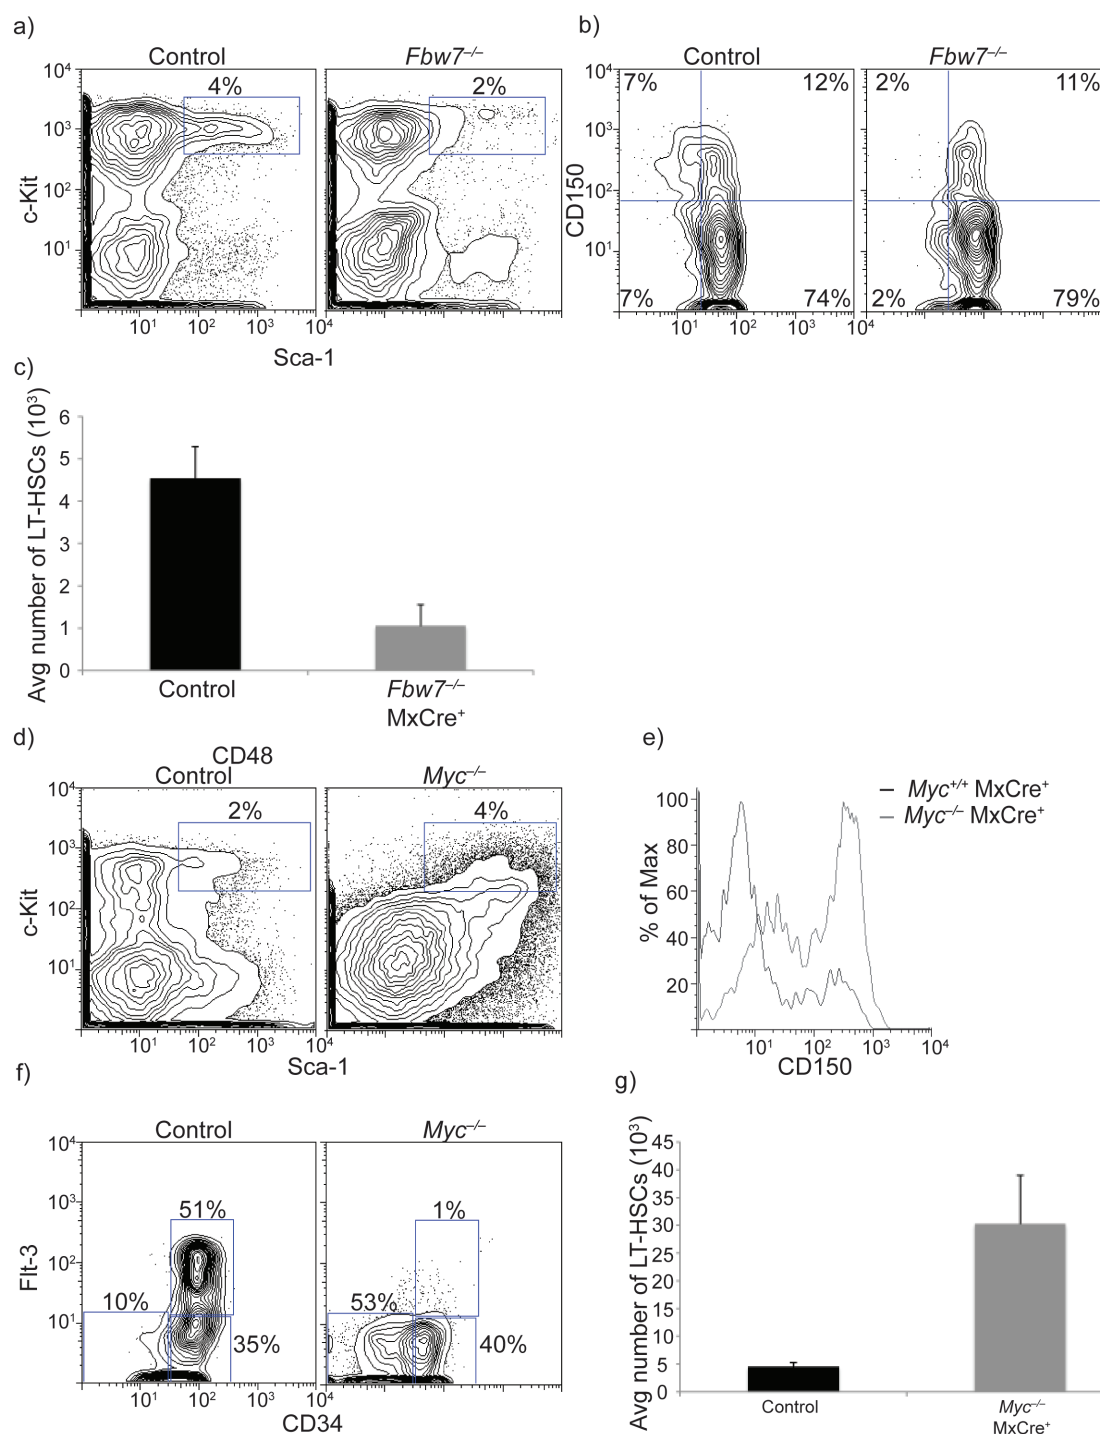

Supplemental Figure 4. Deletion of *Fbw7* and *Myc* show opposing effects on HSC. a) FACS plot of LSK profile in control and *Fbw7*<sup>-/-</sup> mice. b-c) *Fbw7* deletion leads to reduction in percentage (b) and total cell number (c) of LT-HSC population determined by FACS analysis using SLAM markers CD150 and CD48. Black: LT-HSC from control mice, in Grey: LT-HSCs from *Fbw7*<sup>-/-</sup> mice. d) FACS plot of control and *Myc*<sup>-/-</sup> LSK profiles. e-g) overlay and FACS plot of CD150<sup>+</sup>, CD34<sup>-</sup>, and FLT-3<sup>-</sup> LT-HSCs showing an increase the percentage (e-f) and total cell numbers (g) in *Myc*<sup>-/-</sup> mice. In Black: LT-HSC from control mice, in Grey: LT-HSCs from *Myc*<sup>-/-</sup> mice. Error bars indicate standard deviation (std) (n=5 mice). For all genotypes demonstrated n=5 mice. All analyses were performed two weeks post polyI-polyC-mediated gene deletion. Plots are representative of 3 independent experiments.

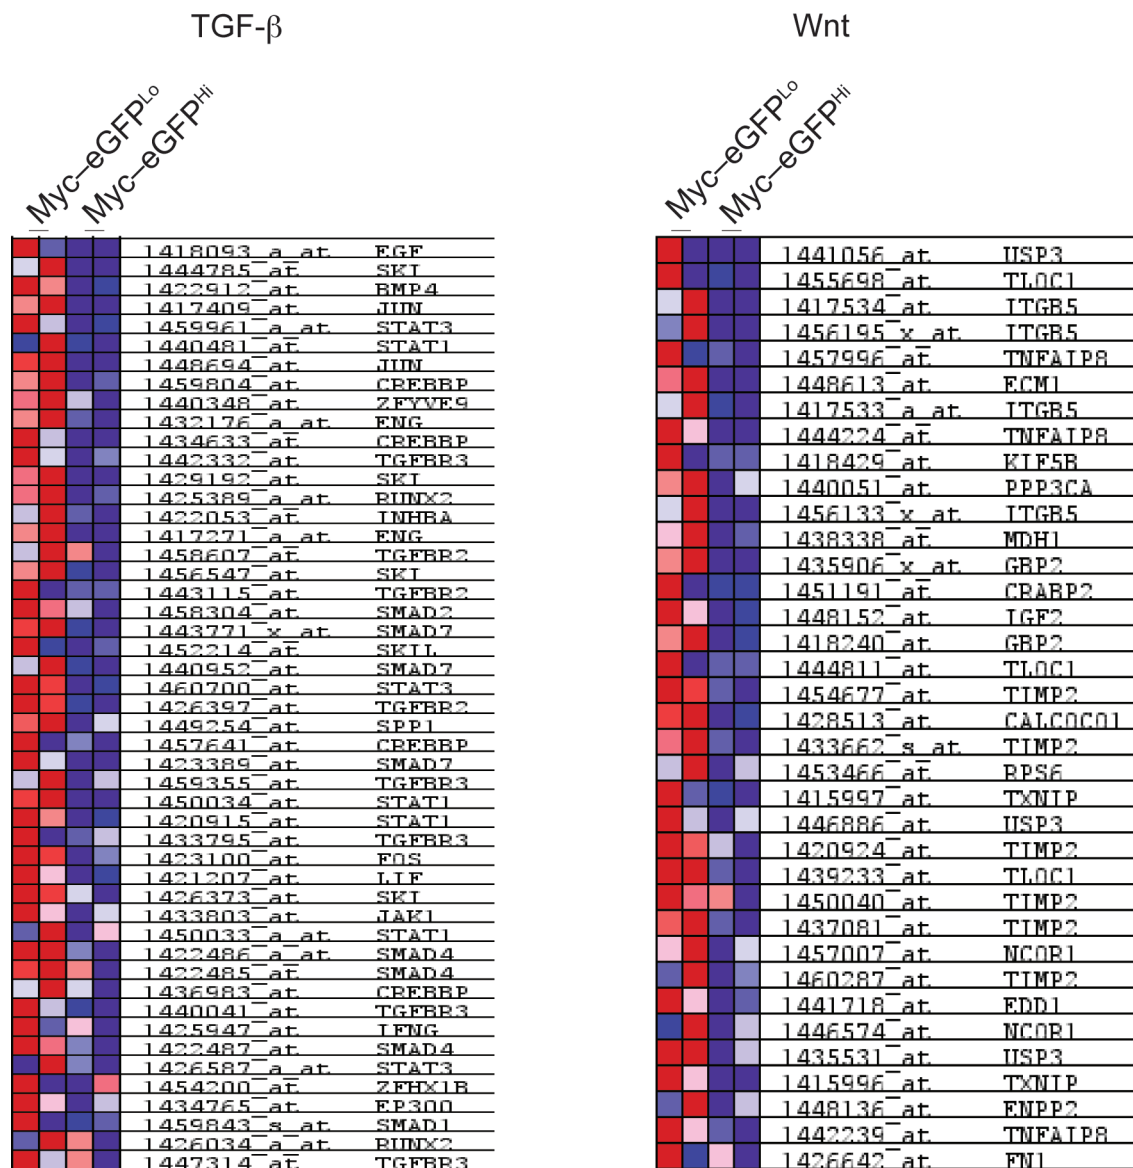

Supplemental Figure 5. Correlation between the c-Myc-eGFP<sup>Lo</sup> fraction and the TGF- $\beta$  and Wnt pathways. “Heat map” depicting upregulation of TGF- $\beta$  and Wnt pathway members in the c-Myc-eGFP<sup>Lo</sup> fraction.  $P < 0.001$ . Red: Up-regulation, Blue: Down-regulation.

a) c-Myc direct target genes

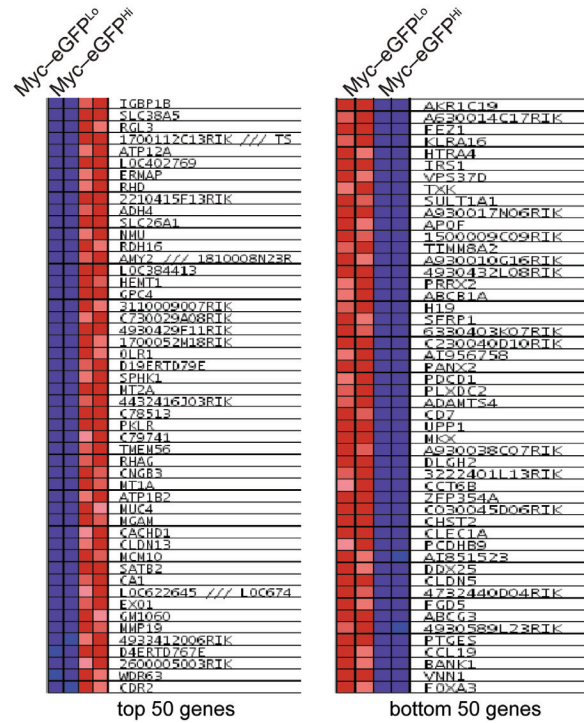

b) c-Myc direct target genes

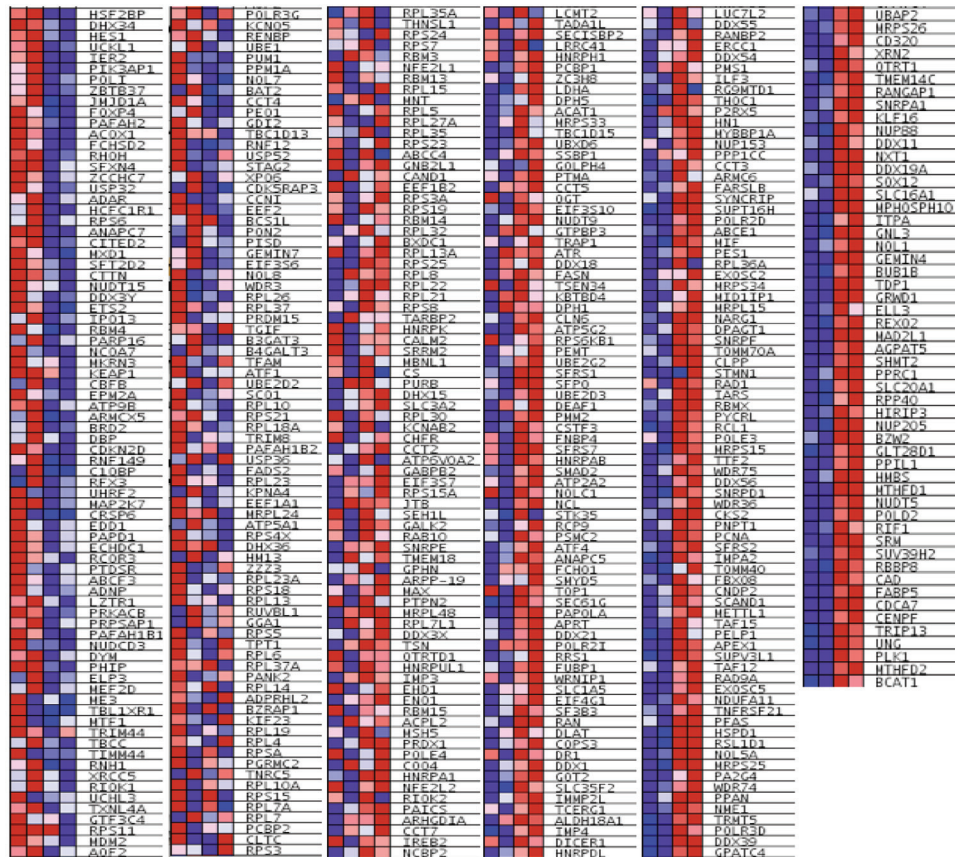

Supplemental Figure 6. Identification of direct c-Myc targets using ChIP2. a) “Heat map” depicting expression of the top and bottom 50 direct c-Myc target genes in the c-Myc-eGFP<sup>Lo</sup> and c-Myc-eGFP<sup>Hi</sup> subsets. b) “Heat map” showing gene expression profiles of c-Myc direct targets in the c-Myc-eGFP<sup>Lo</sup> versus c-Myc-eGFP<sup>Hi</sup> subsets (GSEA). A significant enrichment (P=0.05; NES=-1.98) of c-myc direct targets is present in the c-Myc-eGFP<sup>Hi</sup> over-expressed genes.

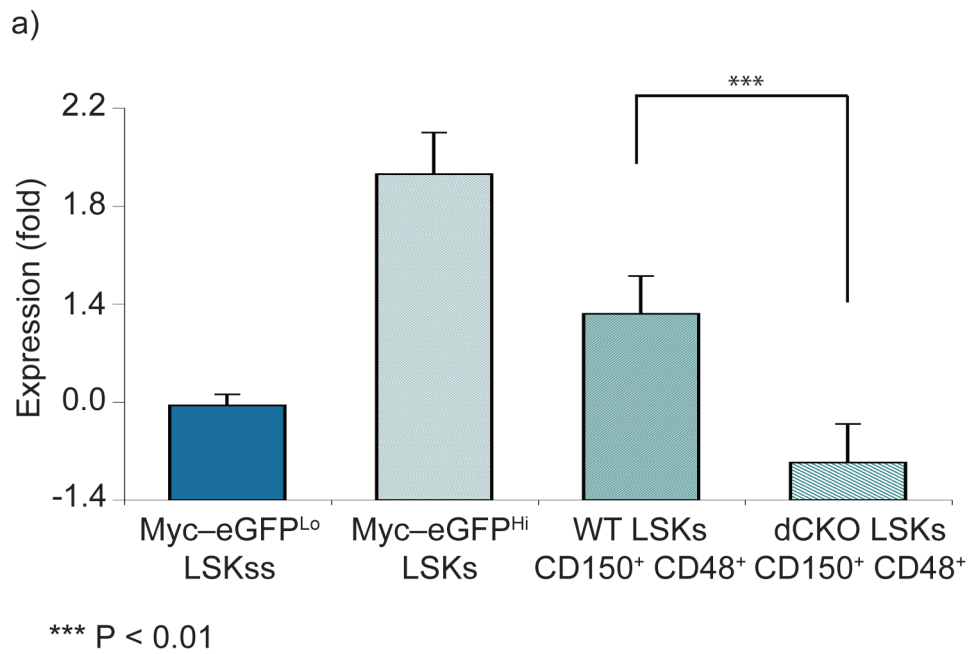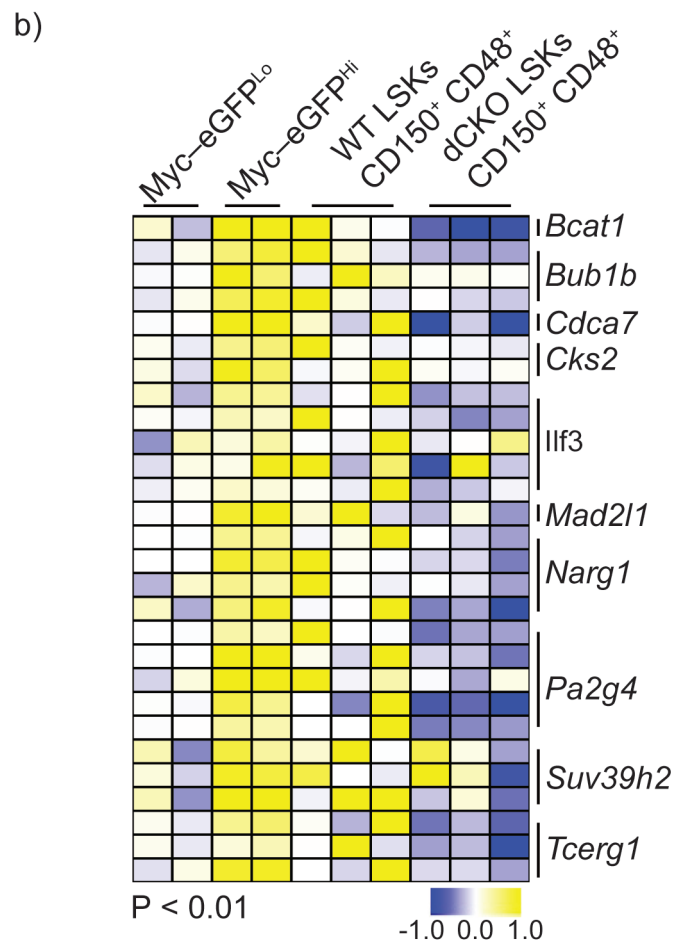

Supplemental Figure 7. Direct regulation of HSC gene expression by c-Myc. a) Mean expression of all probe sets for the 10 “hand picked” validated genes in c-Myc-eGFP<sup>Hi</sup>, c-Myc-eGFP<sup>Lo</sup>, and Laurenti et al16. c- and N-Myc double knock out gene expression array. b) “Heat map” demonstrating gene expression of all probe sets for 10 “hand picked” validated genes in c-Myc-eGFP<sup>Hi</sup>, c-Myc-eGFP<sup>Lo</sup>, and Laurenti et al16 c- and N-Myc double knock out gene expression array.

a)

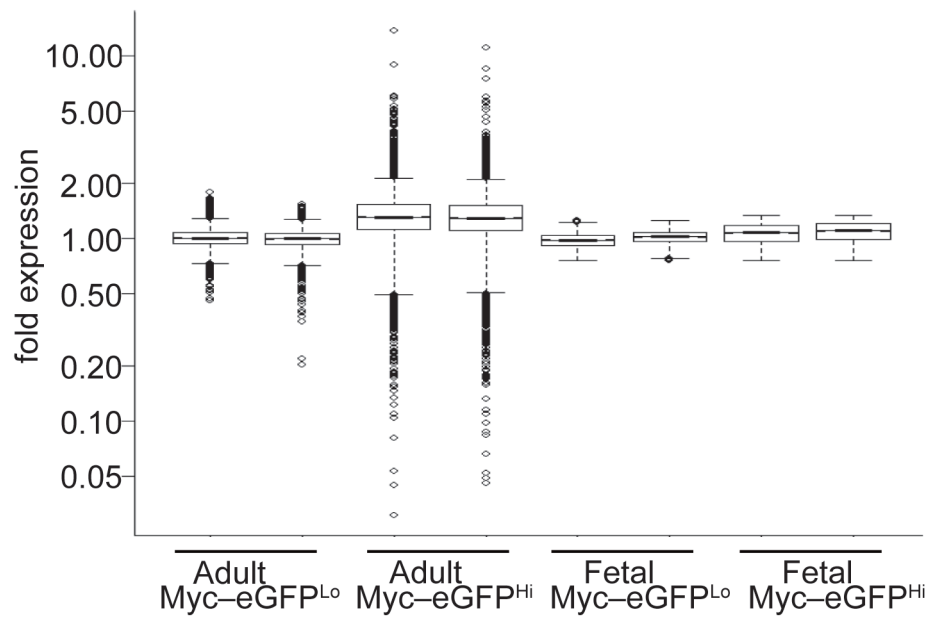

Supplemental Figure 8. Absence of a distinct gene expression signature in fetal c-Myc-eGFP<sup>Lo</sup> and c-Myc-eGFP<sup>Hi</sup> LSKs. Box-Plot demonstrating the relative distribution of normalized gene expression (3865 genes) in the indicated bone marrow adult and fetal liver stem cell/progenitor populations separated based on levels of c-Myc protein expression. Black line: Median expression; Open Circle: outliers.

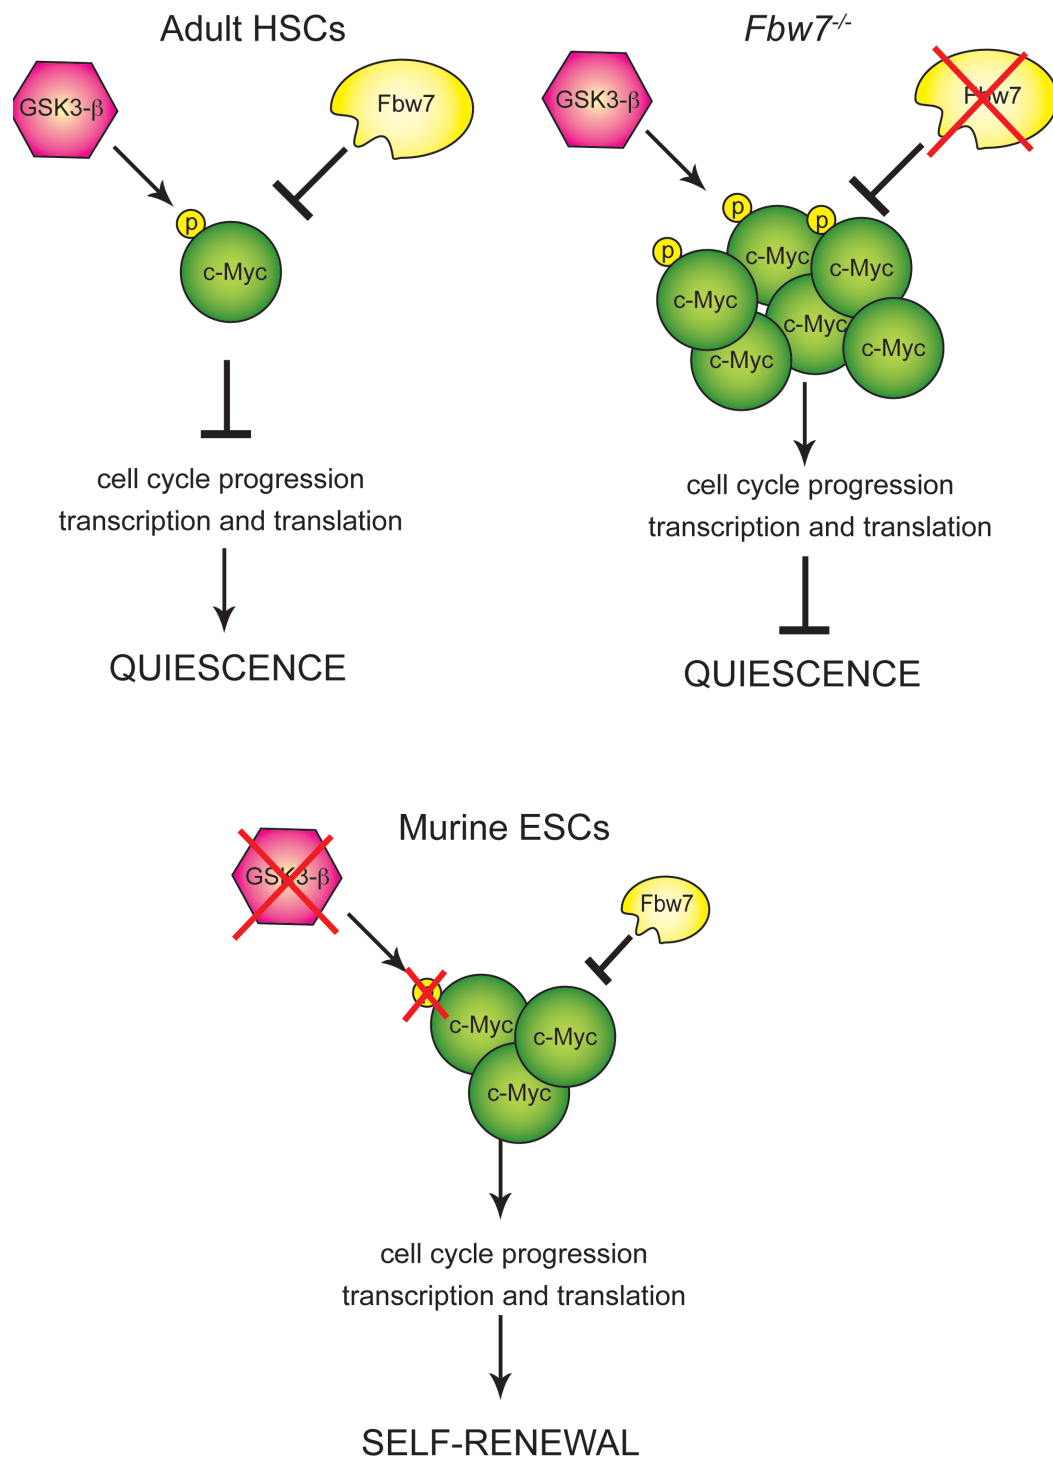

Supplemental Figure 9. Proposed schematic of the role of the Fbw7:c-Myc interaction in adult and embryonic stem cells.

| Gene name      | Forward primer (5'-3')         | Reverse primer (5'-3')        |
|----------------|--------------------------------|-------------------------------|
| <i>Bcat1</i>   | GGGTGCAAATGTGAGTCTCC           | AGTCGCTGCTGATGCAATCC          |
| <i>Cdca7</i>   | ACTCGCCGCTGGCCATCCT            | AGGGGACGCAGAGCAAAAG           |
| <i>Dis3</i>    | AACGTCTTGGACCTGAGCATCTCGCCTCGC | GGGAGGAAACAACCAACTCGCCCAATC   |
| <i>Ilf3</i>    | CCTGTCACGTGATGGAAGC            | AGTAGGCGGGTGAGACGAA           |
| <i>Ipo7</i>    | CGGAGACTTGACAGGAAGTGGCCGGAGCAT | CCCGGAGGGCCTCGATGATGGTGTGGGAT |
| <i>Narg1</i>   | AAAAGAGGCGAAGGGAGTGT           | GCATGGTTCCGGCTCCTC            |
| <i>Nme1</i>    | CAACAGCGGACTGGAAAGAGAATAAGGCAT | GGAGGGAGGTGGGCGTTCACTAAAG     |
| <i>Pa2q4</i>   | AAACCGGAGCAGTGGTCATA           | TCCCCACTTCCTCTCCTACC          |
| <i>Rad9</i>    | CCTCCGCTTCCTTATTGGTT           | GAGGAAGGACACAGGAGCAA          |
| <i>Rpl19</i>   | CGCGACTTAGCGTGA CTTC           | AAATGGTTCAGTCCGACTCC          |
| <i>Rps28</i>   | TTCTAAACACCCGCAGTCG            | AAAGTGAGGCGTGGTCAGAG          |
| <i>Suv39h2</i> | ACTCCACACCACCAGGACTC           | TGCTACATGGCCACATCAAC          |
| <i>Tcerq1</i>  | TCTCGGCTTGCGCTATTAGT           | GCTAGGTCCTCCCAAGTTCC          |
| <i>ActB</i>    | CCCTACAGTGCTGTGGGTTT           | GCAAGGAGTGCAAGAACACA          |

Supplemental Table 1. Sequences of primers used in the ESC and mouse bone marrow progenitor ChIP experiments.

Genotyping primers:

| Gene name       | Forward primer (5'-3')     | Reverse primer (5'-3')     |
|-----------------|----------------------------|----------------------------|
| <i>Fbw7</i>     | ATTGATACAACTGGAGACGAGG     | ATAGTAATCCTCCTGCCTTGGC     |
| <i>Myc</i>      | TAAGAAGTTGCTATTTTGGC       | TTTTCTTTCCGATTGCTGAC       |
| <i>Myc-eGFP</i> | TTCAGGATTGGGGTACGC         | GAAATTCTCTTCCTCGTCGC       |
| <i>MxCre</i>    | GCCTGCATTACCGGTCGATGCAACGA | GTGGCAGATGGCGCGGCAACACCATT |

Quantitative real-time PCR primers:

| Gene name   | Forward primer (5'-3') | Reverse primer (5'-3')   |
|-------------|------------------------|--------------------------|
| <i>Fbw7</i> | GTGATAGAGCCCCAGTTCCA   | CCTCAGCCAAAATTCTCCAG     |
| <i>Myc</i>  | CTTCTCTCCTTCCTCGGACTC  | GGAGATGAGCCCGACTCCGACCTC |
| <i>ActB</i> | AGGTGACAGCATTGCTTCTG   | GGGAGACCAAAGCCTTCATA     |

Supplemental Table 2: Primer sequences used for genotyping mice and quantitative real-time PCR experiments.

Fbw7.shRNA.mus.For1  
CCGGCCAGTCATTAACGAGTGGAATCTCGAGATTCCACTCGTTAATGACTGGTTTTTG  
Fbw7.shRNA.mus.Rev1  
AATTCAAAAACCGAGTCATTAACGAGTGGAATCTCGAGATTCCACTCGTTAATGACTGG  
Fbw7.shRNA.mus.For2  
CCGGCGGAGGATTACATCTGTCCAACCTCGAGTTGGACAGATGTAATCCTCCGTTTTTG  
Fbw7.shRNA.mus.Rev2  
AATTCAAAAACGGAGGATTACATCTGTCCAACCTCGAGTTGGACAGATGTAATCCT

Supplemental Table 3: Sequences of Fbw7 shRNAs.
